# Supplementary material
Source: Elsevier journal article supplement (https://www.sciencedirect.com/science/article/pii/S1888429620301242)
Supplement: mmc1 [file S1888429620301242:mmc1.xlsx]

## Sheet: Ametrop Classif Calculator 
IMPORTANT: These definitions are proposed to be used in epidemiological studies, and not for the analysis of refractive surgery results. This Excel book has several worksheets, please check them by clicking the tabs at the bottom of the window. You will be able to acess example datasets, where you can copy the formulas to your own Excel workbook
AMETROPIAS CLASSIFICATION TOOL (EYES)
Sphere	Negative Cylinder	Spherical Equivalent	Emmetropia	Myopia	Hyperopia	Mixed Astigmatism
3	-2	2	0	0	1	0
⇑ Insert value of the sphere in the upper cell	⇑ Insert value of the cylinder (negative notation) in the upper cell	⇑ Calculated spherical equivalent	⇑ ⇑ ⇑ ⇑ The number 1 will appear in the classification to which the refractive error of the given eye corresponds
AMETROPIAS CLASSIFICATION TOOL (INDIVIDUALS)
Right eye		Left eye		Emmetropia	Myopia	Hyperopia	Mixed Astigmatism	Anisometropia
H		MA		0	0	0	0	1
⇑ Click the down arrow to the right of the cell to insert from the drop down list the classification for the right eye according the definitions (calculator above): E=Emmetropia. M=Myopia. H=Hyperopia. MA=Mixed astigmatism.		⇑ Click the down arrow to the right of the cell to insert from the drop down list the classification for the left eye according the definitions (calculator above): E=Emmetropia. M=Myopia. H=Hyperopia. MA=Mixed astigmatism.		⇑ ⇑ ⇑ ⇑ ⇑ The number 1 will appear in the classification to which the refractive error of the given individual corresponds
Tool designed by Dr Virgilio Galvis and Dr Alejandro Tello - Centro Oftalmológico Virgilio Galvis -Floridablanca, Colombia
Email: alejandrotello@gmail.com
v4.0 / 11 October 2020
Please click the tabs at the bottom to access example datasets shown in separate worksheets, where you can copy the formulas to your own Excel workbook.

## Sheet: Example dataset Eyes
Important: These definitions are proposed to be used in epidemiological studies, and not for the analysis of refractive surgery results.
Sphere	Negative Cylinder	Spherical Equivalent	Emmetropia	Myopia	Hyperopia	Mixed Astigmatism	Validation
-10	-4	-12	0	1	0	0	1	⇒ Row 3: You can enter data in columns A & B to obtain a classification. Columns D through H, which contain the formulas to define the refractive error classification, are locked in this row to protect the formulas. If you want to copy them to apply them in another Excel file you can copy them from the lower rows, but make sure they have not been accidentally altered. Column H ("Validation") is t…
0	-0.5	-0.25	1	0	0	0	1
0	-0.75	-0.375	1	0	0	0	1
0	-1	-0.5	0	1	0	0	1
0	-1.25	-0.625	0	1	0	0	1
0	-1.5	-0.75	0	1	0	0	1
-0.25	-0.25	-0.375	1	0	0	0	1
-0.25	-0.5	-0.5	0	1	0	0	1
-0.25	-0.75	-0.625	0	1	0	0	1
-0.25	-1	-0.75	0	1	0	0	1
-0.5	0	-0.5	0	1	0	0	1
-0.5	-0.5	-0.75	0	1	0	0	1
0.25	-0.25	0.125	1	0	0	0	1
0.25	-0.5	0	1	0	0	0	1	Tool designed by Dr Virgilio Galvis and Dr Alejandro Tello
0.25	-0.75	-0.125	1	0	0	0	1	Centro Oftalmológico Virgilio Galvis - Floridablanca, Colombia
0.25	-1	-0.25	0	0	0	1	1	Email: alejandrotello@gmail.com
0.5	-0.25	0.375	1	0	0	0	1	v4.0 / 11 October 2020
0.5	-0.5	0.25	1	0	0	0	1
0.5	-0.75	0.125	1	0	0	0	1
0.5	-1	0	0	0	0	1	1
0.75	-0.25	0.625	0	0	1	0	1
0.75	-0.5	0.5	0	0	1	0	1
0.75	-0.75	0.375	1	0	0	0	1
0.75	-1	0.25	0	0	0	1	1
4	-6	1	0	0	0	1	1
-3	-6	-6	0	1	0	0	1
1	-2	0	0	0	0	1	1
1	-3	-0.5	0	0	0	1	1
2	-1	1.5	0	0	1	0	1
1	-2	0	0	0	0	1	1
5	-6	2	0	0	0	1	1
4	-8	0	0	0	0	1	1
3	-8	-1	0	0	0	1	1
7	-9	2.5	0	0	0	1	1
-5	-2	-6	0	1	0	0	1
5	-4	3	0	0	1	0	1
1	0	1	0	0	1	0	1
1	-1	0.5	0	0	1	0	1
1.5	-1	1	0	0	1	0	1
2	-2	1	0	0	1	0	1
2	-3	0.5	0	0	0	1	1
2	-5	-0.5	0	0	0	1	1
This Excel workbook has three separate worksheets including a calculator and two example datasets (where you can copy the formulas to your own Excel workbook). Please click the tabs at the bottom to access them.

## Sheet: Example dataset Individuals
Important: These definitions are proposed to be used in epidemiological studies, and not for the analysis of refractive surgery results.
Right Eye	Left Eye	Emmetropia	Myopia	Hyperopia	Mixed Astigmatism	Anisometropia	Validation
E	E	1	0	0	0	0	1	⇒ Row 3: You can enter data in columns A & B to obtain a classification. Columns C through H, which contain the formulas to define the refractive error classification of the individual, are locked in this row to protect the formulas. If you want to copy them to apply them in another Excel file you can copy them from the lower rows, but make sure they have not been accidentally altered. Column H (…
E	M	0	1	0	0	0	1
E	H	0	0	1	0	0	1
E	MA	0	0	0	1	0	1
M	M	0	1	0	0	0	1
M	E	0	1	0	0	0	1
M	H	0	0	0	0	1	1
M	MA	0	0	0	0	1	1
H	H	0	0	1	0	0	1
H	E	0	0	1	0	0	1
H	M	0	0	0	0	1	1
H	MA	0	0	0	0	1	1
MA	MA	0	0	0	1	0	1
MA	E	0	0	0	1	0	1	Tool designed by Dr Virgilio Galvis and Dr Alejandro Tello
MA	M	0	0	0	0	1	1	Centro Oftalmológico Virgilio Galvis - Floridablanca, Colombia
MA	H	0	0	0	0	1	1	Email: alejandrotello@gmail.com	v4.0 / 11 October 2020
This Excel workbook has three separate worksheets including a calculator and two example datasets (where you can copy the formulas to your own Excel workbook). Please click the tabs at the bottom to access them.
